# Supplementary material for: Combination of a large cation and coordinating additive improves carrier transport properties in quasi-2D perovskite solar cells
Source: Royal Society of Chemistry journal article supplement (doi:10.1039/d0ta12431a), 2021-01-01
Supplement: d0ta12431a1.pdf [file d0ta12431a1.pdf]

## Supporting Information

# Combination of large cation and coordinating additive improves carrier transport properties in quasi-2D perovskite solar cells

*Sylvester Sahayaraj<sup>1</sup>, Eros Radicchi<sup>2,3</sup>, Marcin Ziólek<sup>4</sup>, Mateusz Ścigaj<sup>5</sup>,  
Magdalena Tamulewicz-Szwajkowska<sup>6</sup>, Jarosław Serafińczuk<sup>6</sup>, Filippo De  
Angelis<sup>2,3,7</sup>, Konrad Wojciechowski<sup>1,5</sup>*

<sup>1</sup>Saule Research Institute, Wrocław Technology Park, 11 Dunska, 54-130 Wrocław, Poland

<sup>2</sup>Department of Chemistry, Biology and Biotechnology, University of Perugia, via Elce di Sotto 8, 06123 Perugia, Italy

<sup>3</sup>Computational Laboratory for Hybrid/Organic Photovoltaics (CLHYO), CNR-ISTM, via Elce di Sotto 8, 06123 Perugia, Italy.

<sup>4</sup>Faculty of Physics, Adam Mickiewicz University, Uniwersytetu Poznańskiego 2, 61-614 Poznań, Poland.

<sup>5</sup>Saule Technologies, Wrocław Technology Park, 11 Dunska, 54-130 Wrocław, Poland.

<sup>6</sup>Department of Nanometrology, Faculty of Microsystem Electronics and Photonics, Wrocław University of Science and Technology, Janiszewskiego 11/17, Wrocław, Poland.

<sup>7</sup>CompuNet, Istituto Italiano di Tecnologia, Via Morego 30, 16163 Genova, Italy.

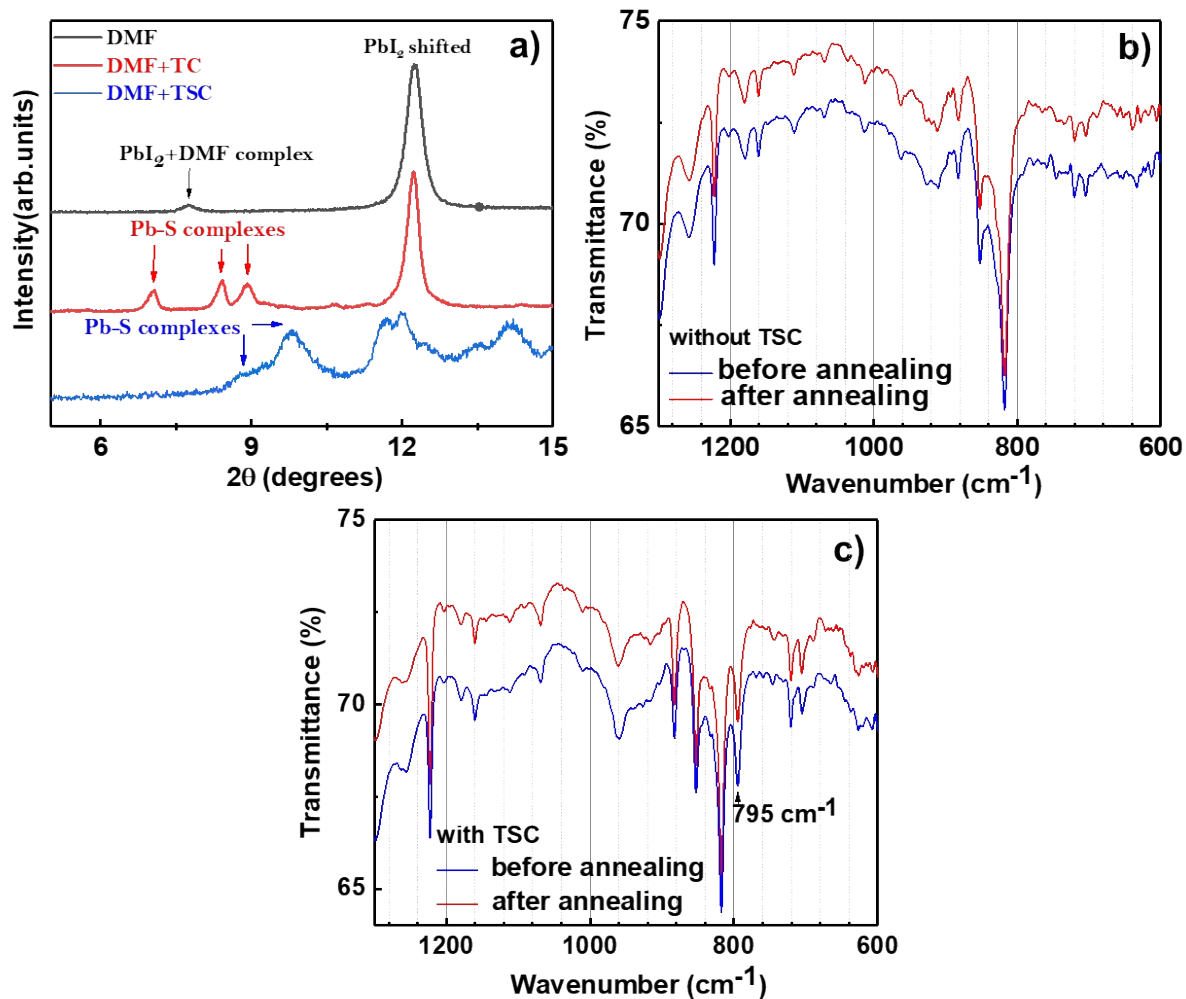

Figure S1. a) X-ray diffractograms (XRD) of PbI<sub>2</sub> films processed from the different DMF solutions; FTIR spectra of spin-coated perovskite films (before and after annealing), processed from the precursor solution a) without, and b) with the TSC additive.

Variation of  $\text{NH}_4\text{Cl}$  in the precursor (mol%w.r.t Pb)

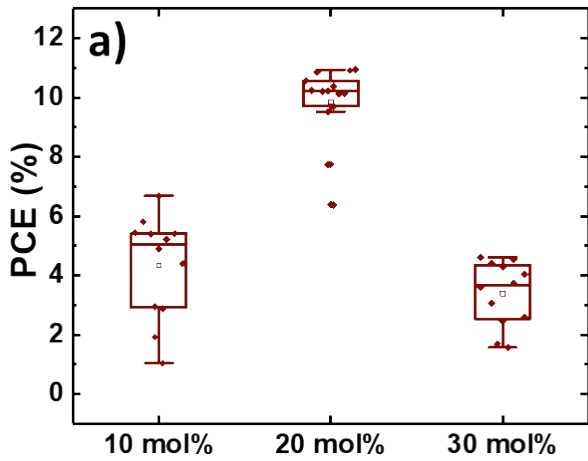

Variation of  $\text{NH}_4\text{SCN}$  in the precursor (mol%w.r.t Pb)

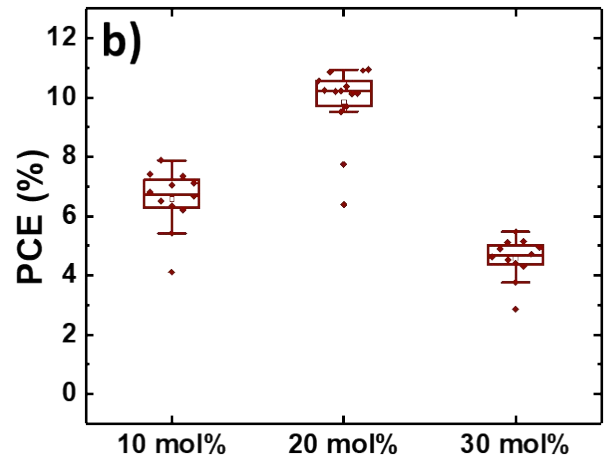

Figure S2. Graphical representation of the statistics of photovoltaic parameters extracted from the JV characterization measurements of a batch of quasi-2D perovskite solar cells, prepared with a) varied amount of  $\text{NH}_4\text{Cl}$  additive and fixed amount (20 mol%) of  $\text{NH}_4\text{SCN}$ , and b) varied amount of  $\text{NH}_4\text{SCN}$  additive and fixed amount (20 mol%) of  $\text{NH}_4\text{Cl}$  additive. Each dot corresponds to an individual solar cell.

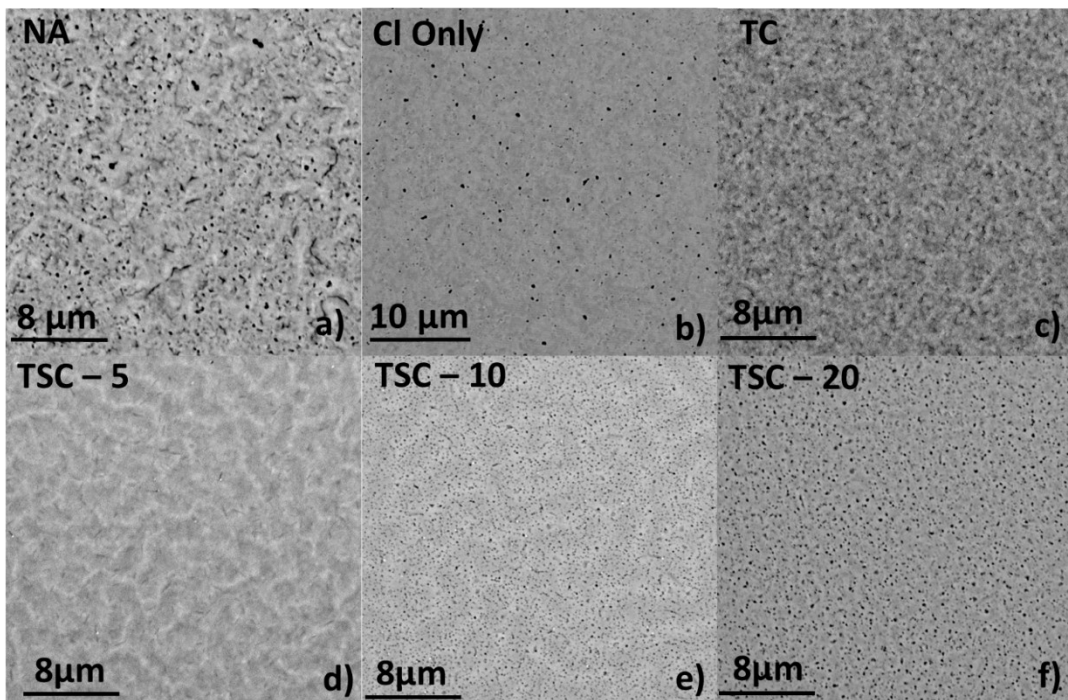

Figure S3. a- f) SEM images of quasi-2D perovskite films, with  $\text{PEA}^+$  organic spacer, and different additive combinations.

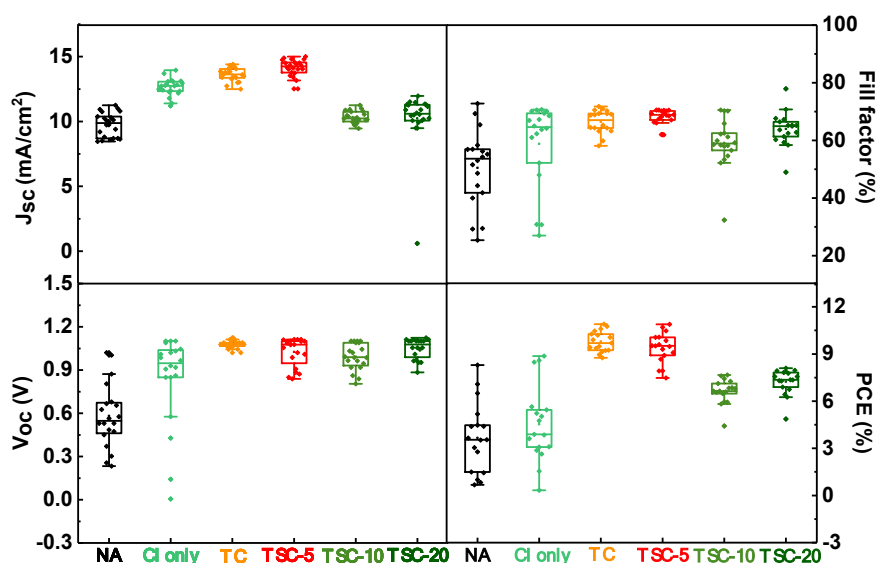

Figure S4. Graphical representation of the statistics of photovoltaic parameters extracted from the JV characterization measurements of a larger set of quasi-2D perovskite solar cells, prepared with PEA<sup>+</sup> organic spacer and different additive combinations. Each dot corresponds to an individual solar cell.

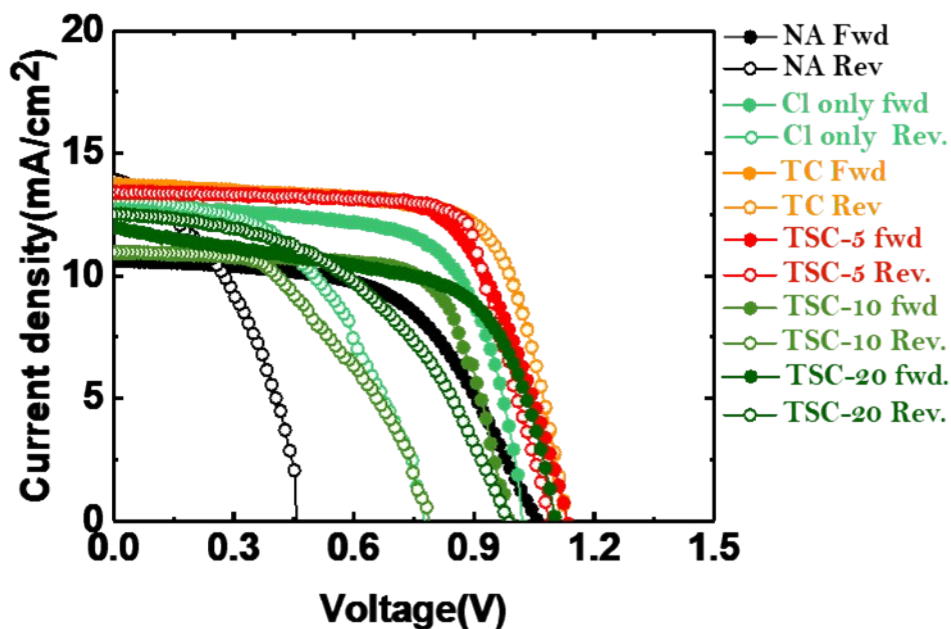

Figure S5. JV characteristics (forward and reverse scan directions) of quasi-2D perovskite solar cells, with PEA<sup>+</sup> organic spacer, and different additive combinations.

Table S1. Photovoltaic parameters extracted from the JV characterizations (shown in Figure S3) of quasi-2D perovskite solar cells, with PEA<sup>+</sup> organic spacer, and different additive combinations. The ratio of the SPO-derived and JV-derived efficiency is also provided.

| Sample code                | Scan direction | J <sub>sc</sub> (mA/cm <sup>2</sup> ) | V <sub>oc</sub> (V) | FF (%) | Efficiency (%) | PCE <sub>SPO</sub> (%) | PCE <sub>SPO</sub> /PCE <sub>JV</sub> |
|----------------------------|----------------|---------------------------------------|---------------------|--------|----------------|------------------------|---------------------------------------|
| <b>No additives (NA)</b>   | Forward        | 10.8                                  | 1.02                | 59     | 8.3            | -                      | -                                     |
|                            | Reverse        | 14                                    | 0.45                | 38     | 2.8            |                        |                                       |
| <b>Cl<sup>-</sup> only</b> | Forward        | 13                                    | 1.08                | 62.12  | 8.9            | 7.9                    | 0.88                                  |
|                            | Reverse        | 13.3                                  | 0.78                | 49.7   | 5              |                        |                                       |
| <b>TC</b>                  | Forward        | 13.6                                  | 1.12                | 71.6   | 10.9           | 11                     | 1                                     |
|                            | Reverse        | 13.8                                  | 1.12                | 70.6   | 11             |                        |                                       |
| <b>TSC-5</b>               | Forward        | 15                                    | 1.11                | 68     | 10.8           | 10.5                   | 0.97                                  |
|                            | Reverse        | 14.8                                  | 1.09                | 65     | 10.3           |                        |                                       |
| <b>TSC -10</b>             | Forward        | 12                                    | 0.92                | 75.8   | 7.7            | 7                      | 0.91                                  |
|                            | Reverse        | 11.05                                 | 0.52                | 52.9   | 3              |                        |                                       |
| <b>TSC -20</b>             | Forward        | 11.4                                  | 1.1                 | 62.5   | 7.9            | 7.3                    | 0.92                                  |
|                            | Reverse        | 12.1                                  | 0.96                | 49.2   | 5.8            |                        |                                       |

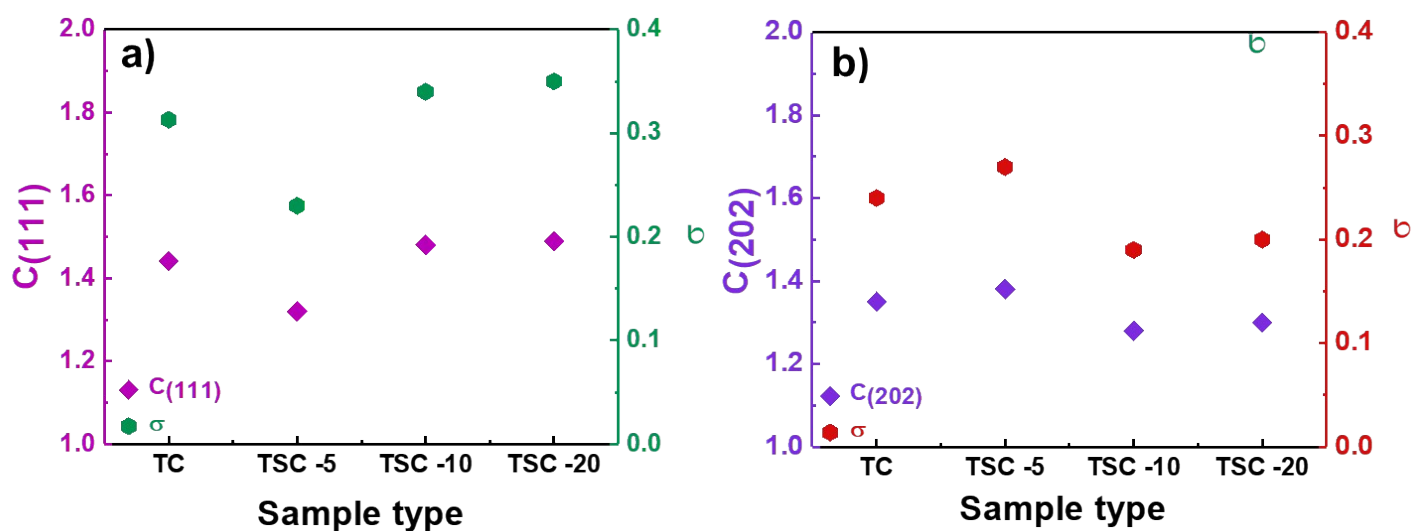

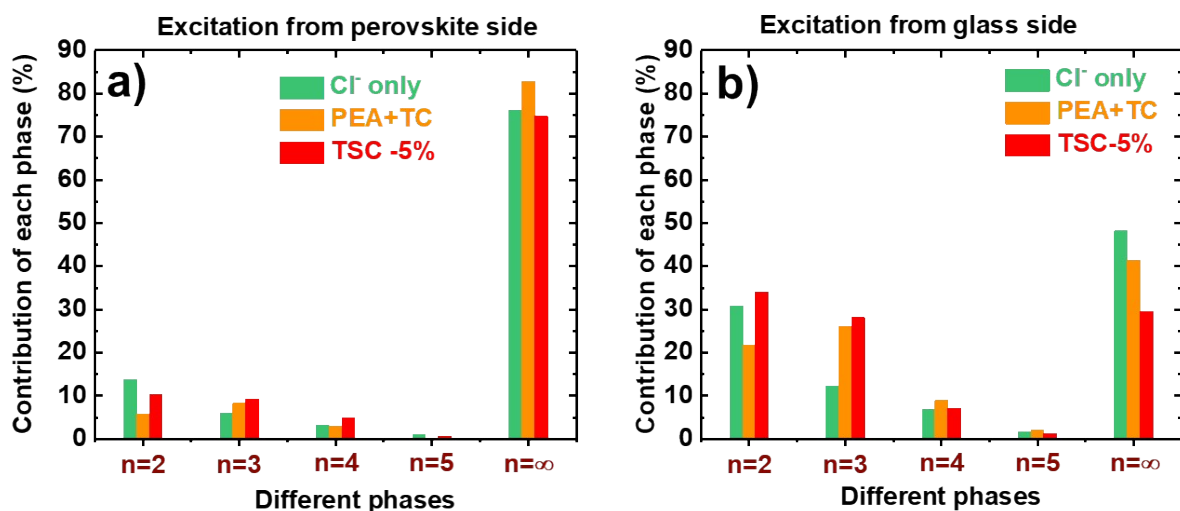

Figure S7. Representation of the proportion of different phases present in the quasi-2D perovskite films, when probed from the a) perovskite side, and b) glass side.

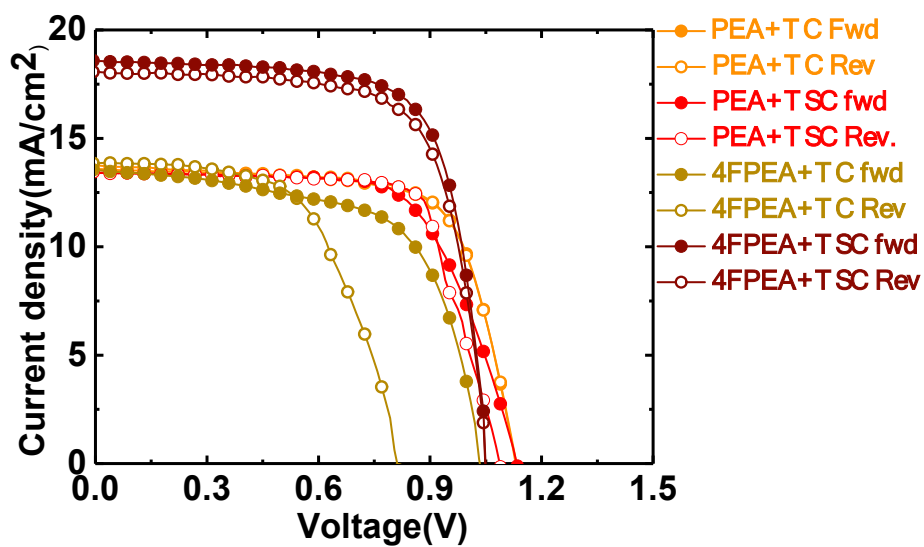

Figure S8. JV characteristics (forward and reverse scan directions) of quasi-2D perovskite solar cells, with different combinations of large cation and templating additive.

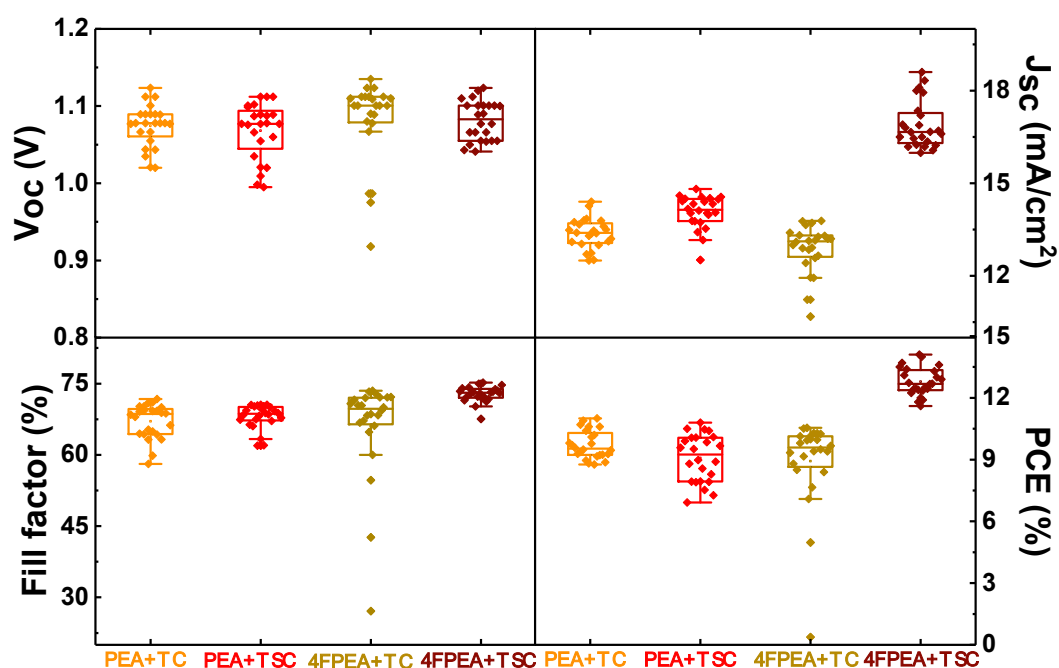

Figure S9. Graphical representation of the statistics of photovoltaic parameters extracted from the JV characterization measurements of a larger set of quasi-2D perovskite solar cells, prepared with different combinations of large cation and templating additive. Each dot corresponds to an individual solar cell.

Table S2. Photovoltaic parameters extracted from the JV characterizations (shown in Figure S7) of quasi-2D perovskite solar cells, prepared with different combinations of large cation and templating additive. The ratio of the SPO-derived and JV-derived efficiency is also provided.

| Sample code | Scan direction | $J_{sc}$ (mA/cm <sup>2</sup> ) | $V_{oc}$ (V) | FF (%) | Efficiency (%) | PCE <sub>SPO</sub> (%) | PCE <sub>SPO</sub> /PCE <sub>JV</sub> |
|-------------|----------------|--------------------------------|--------------|--------|----------------|------------------------|---------------------------------------|
| PEA + TC    | Forward        | 13.6                           | 1.12         | 71.6   | 10.9           | 11                     | 1                                     |
|             | Reverse        | 13.8                           | 1.12         | 70.6   | 11             |                        |                                       |
| PEA + TSC   | Forward        | 15                             | 1.11         | 68     | 10.8           | 10.5                   | 0.97                                  |
|             | Reverse        | 14.8                           | 1.09         | 65     | 10.3           |                        |                                       |
| 4FPEA+TC    | Forward        | 13.6                           | 1.1          | 58.6   | 9.1            | -                      | -                                     |
|             | Reverse        | 13.9                           | 1.03         | 44.3   | 6.4            |                        |                                       |
| 4FPEA+TSC   | Forward        | 18.6                           | 1.05         | 73.2   | 14.06          | 13.8                   | 0.98                                  |
|             | Reverse        | 18.1                           | 1.05         | 71.5   | 13.6           |                        |                                       |



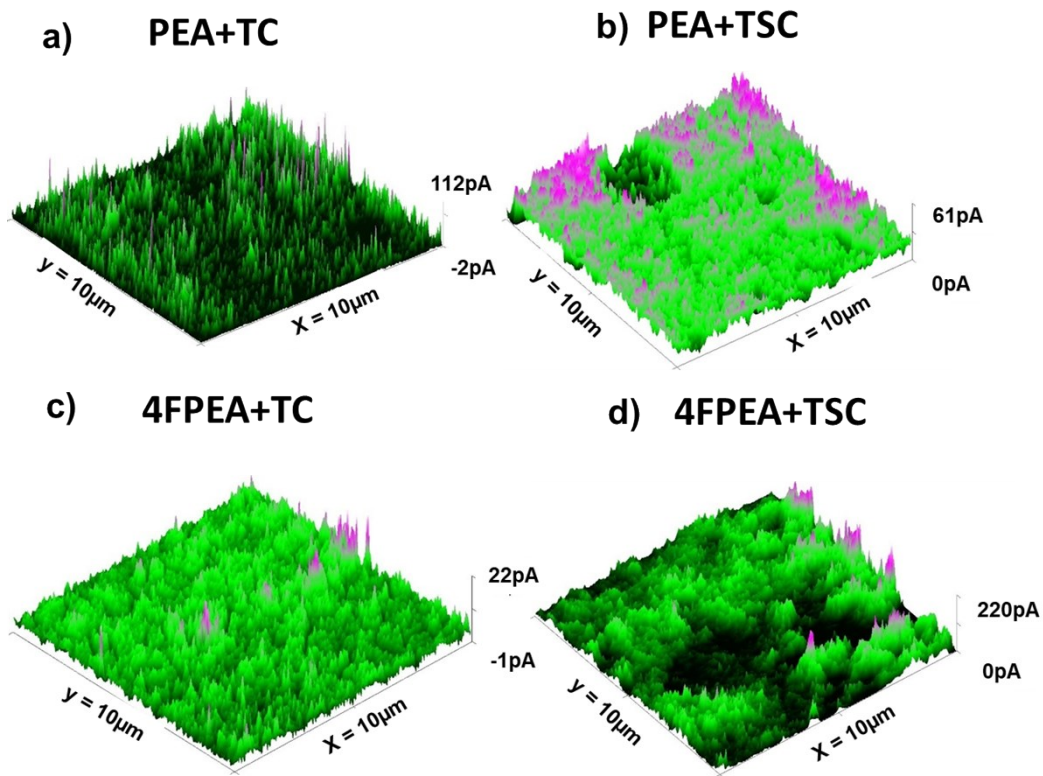

Figure S10. a- d) 3D current maps, obtained from c-AFM measurements, of different quasi-2D perovskite films, prepared with different combinations of large cation and templating additive.

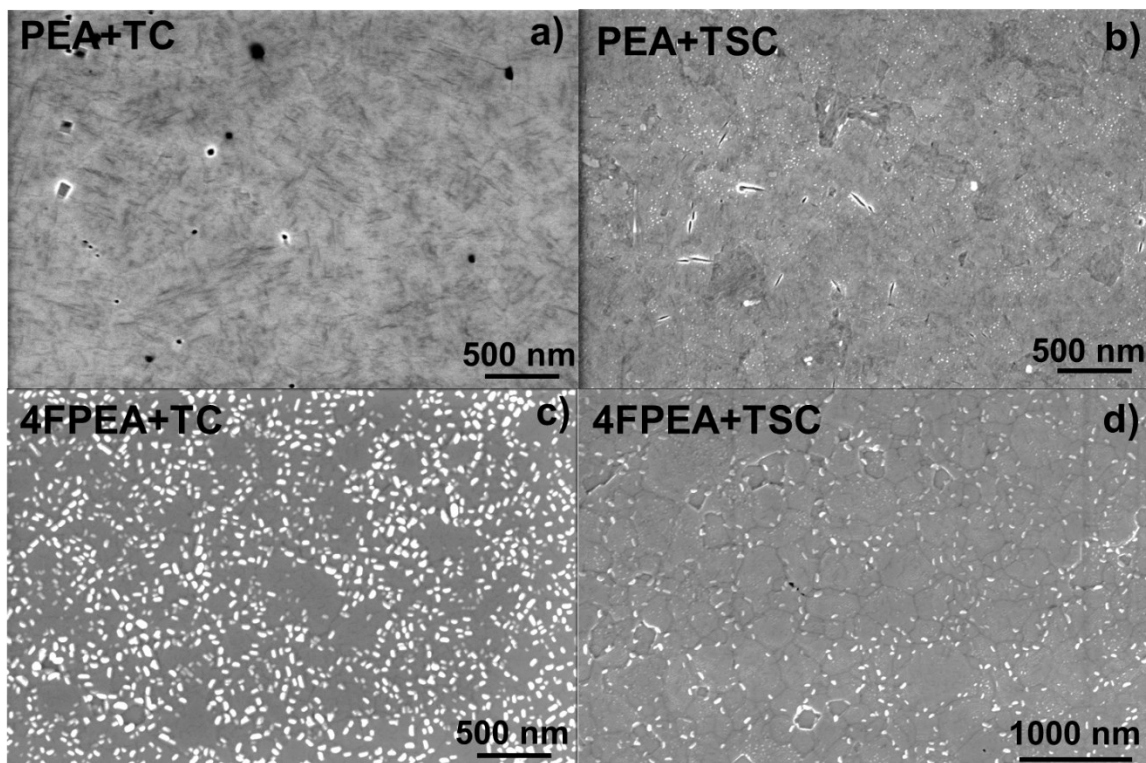



Figure S11. a-d) SEM images of quasi-2D perovskite films, prepared with different combinations of large cation and templating additive.

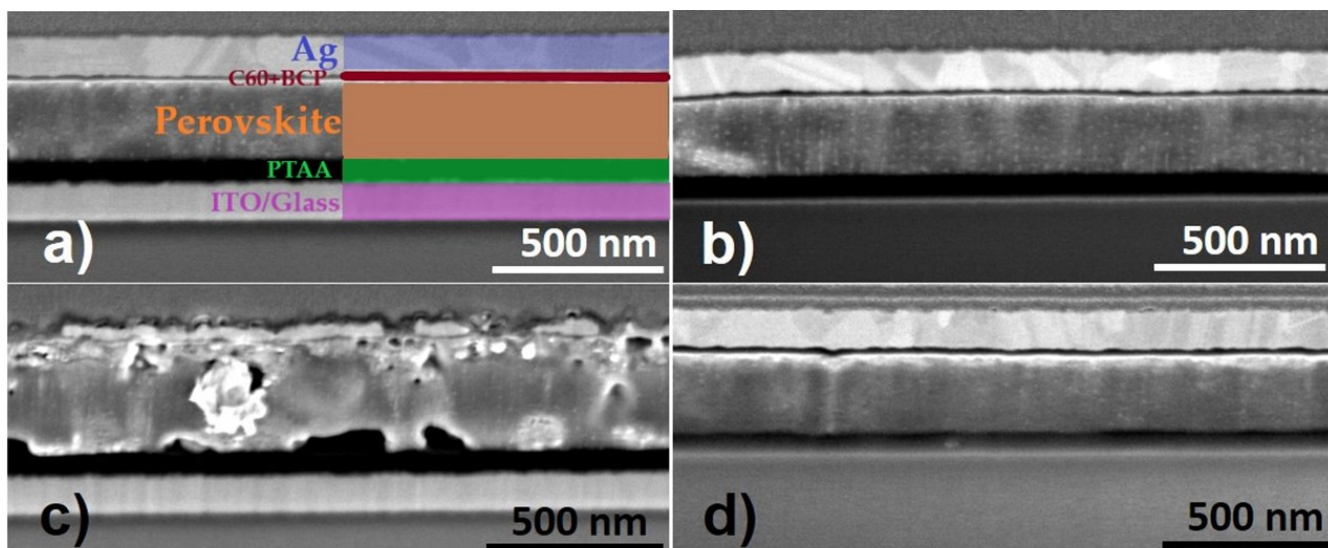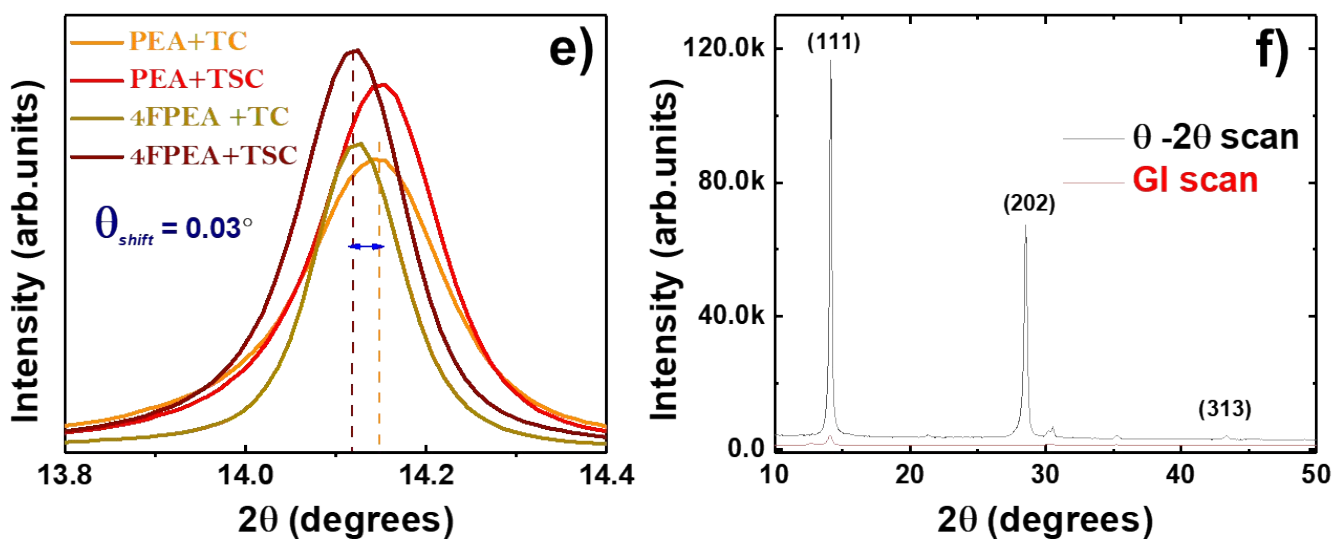

Figure S12. a-d) Cross-section SEM images of quasi-2D perovskite films, prepared with different combinations of large cation and templating additive; e) Zoomed-in section of the XRD pattern showing the change in the peak positions with the inclusion of 4F-PEAI; f) comparison of the conventional and grazing incidence XRD scan.

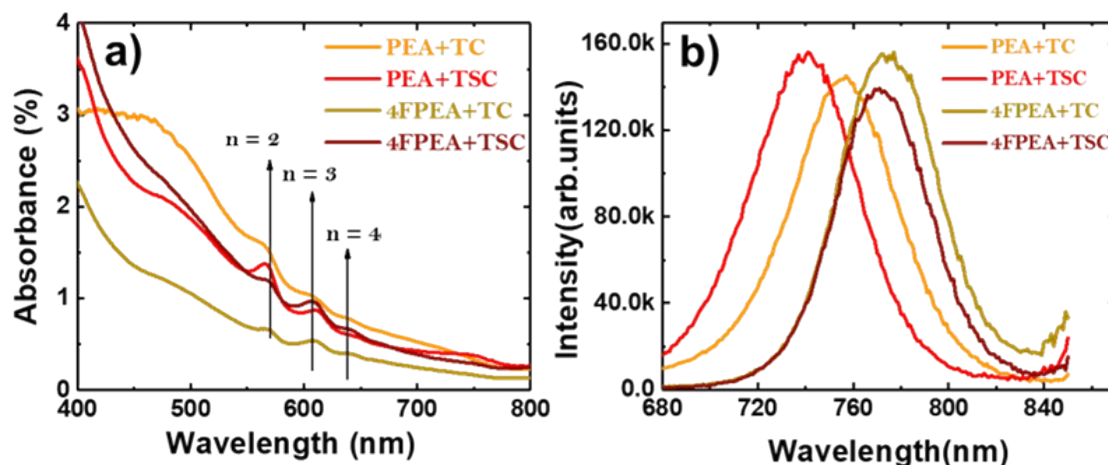

Figure S13. a) UV-Vis absorption spectra of quasi-2D perovskite films, prepared with different combinations of large cation and templating additive; b) steady-state photoluminescence spectra of the same samples.

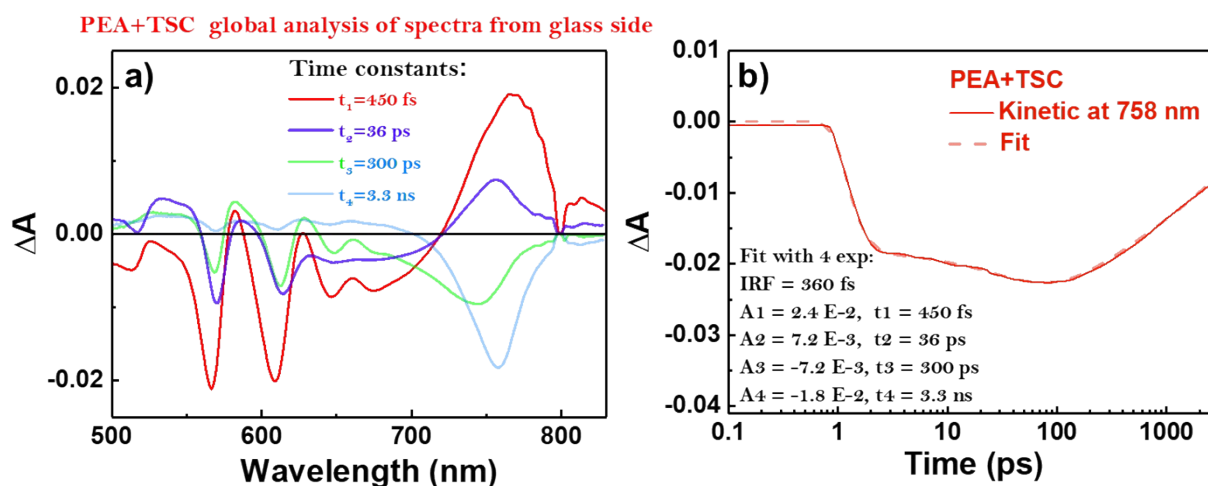

Figure S14. a) Global analysis of the decay of different phases, observed in the perovskite sample 'PEA+TSC', excited through the glass-side; b) 4-exponential fit for the bleach at 758 nm, with different time constant values, derived for the 'PEA+TSC' sample.

Transient absorption spectra were globally analysed with the Surface Explorer Software

Table S3. Proportion ratio for each phase identified in different quasi-2D perovskite films (different combinations of large cation and templating additive), counted as the phase contribution probed from the glass-side divided by its contribution probed from the perovskite-side.

| Sample name | $P_{\text{glass}}/P_{\text{PVK}}$<br>n = 2 | $P_{\text{glass}}/P_{\text{PVK}}$<br>n = 3 | $P_{\text{glass}}/P_{\text{PVK}}$<br>n = 4 | $P_{\text{glass}}/P_{\text{PVK}}$<br>n = 5 | $P_{\text{glass}}/P_{\text{PVK}}$<br>n = $\infty$ |
|-------------|--------------------------------------------|--------------------------------------------|--------------------------------------------|--------------------------------------------|---------------------------------------------------|
| PEA +TC     | 3.7                                        | 3.2                                        | 3.1                                        | 10                                         | 0.5                                               |
| PEA +TSC    | 3.3                                        | 3.1                                        | 1.4                                        | 2.1                                        | 0.4                                               |
| 4FPEA +TC   | 2.7                                        | 3.1                                        | 2.5                                        | 1.8                                        | 0.5                                               |
| 4FPEA +TSC  | <b>1</b>                                   | <b>1.1</b>                                 | <b>1</b>                                   | <b>0.9</b>                                 | <b>1</b>                                          |

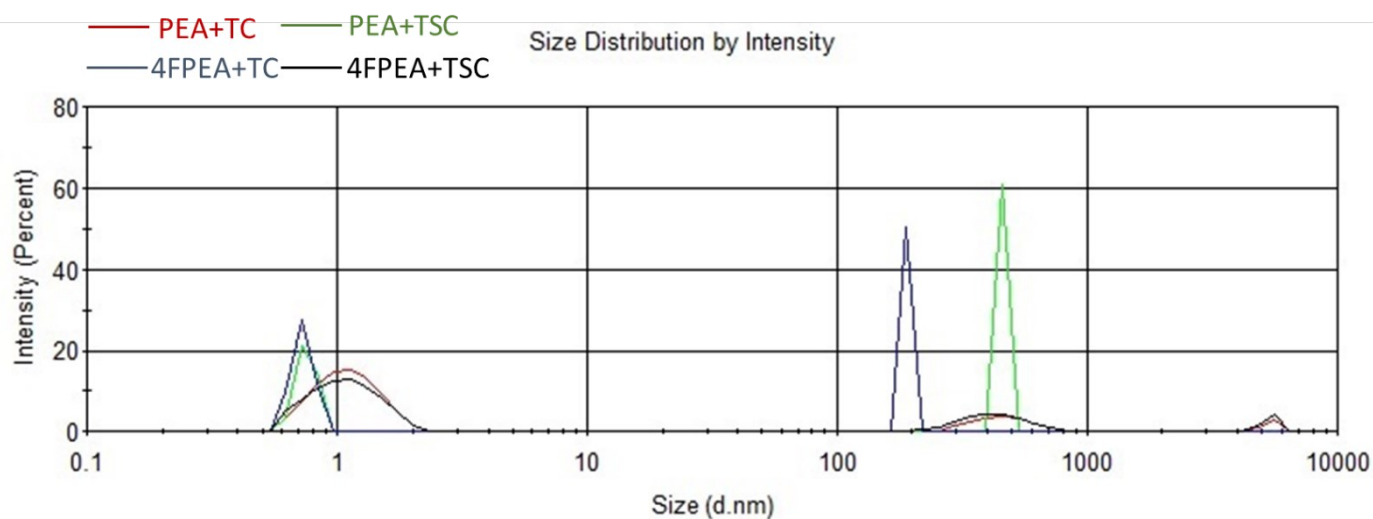

Table S4. Solubility of different organic iodides used for the formation of quasi-2D perovskite films in DMF.

| Material           | MAI   | PEAI  | 4F-PEAI |
|--------------------|-------|-------|---------|
| Solubility (g/ml)  | 1.031 | 2.163 | 1.597   |
| Solubility (mol/l) | 5     | 4.5   | 4       |

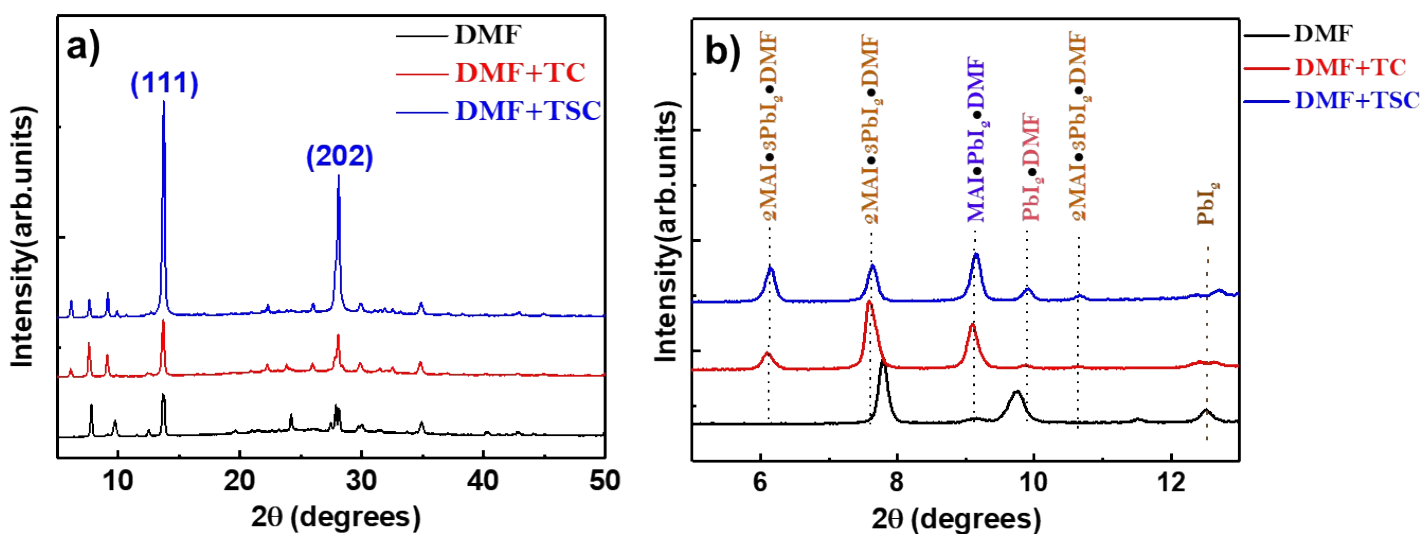

Figure S16. a) X-ray diffractograms (XRD) of MAI+PbI<sub>2</sub> films spin-coated from different DMF solutions; b) zoom-in at the low angle range depicting different intermediate phases.

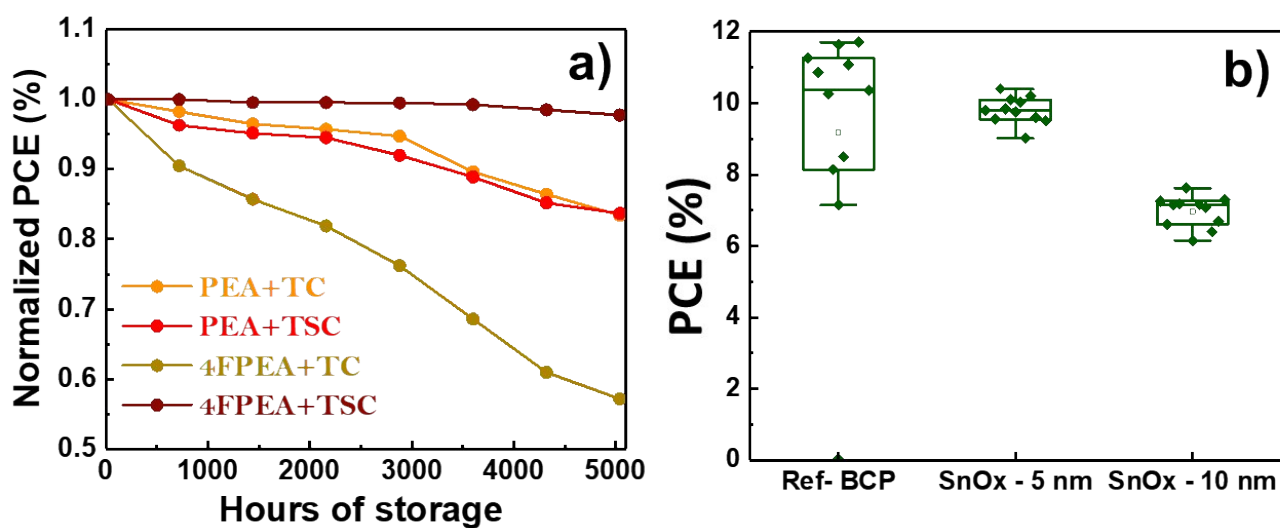

Figure S17. a) Normalized PCE evolution of quasi-2D perovskite solar cells (prepared with different combinations of large cation and templating additive) as a function of storage time in inert atmosphere; b) statistics of photovoltaic parameters extracted from the JV characterization measurements of quasi-2D perovskite solar cells, prepared with different buffer layers inserted before the back-contact electrode.
